# Supplementary material for: Oleuropein represses the radiation resistance of ovarian cancer by inhibiting hypoxia and microRNA-299-targetted heparanase expression
Source: Royal Society of Chemistry journal article supplement (doi:10.1039/c7fo00552k), 2017-01-01
Supplement: c7fo00552k1.pdf [file c7fo00552k1.pdf]

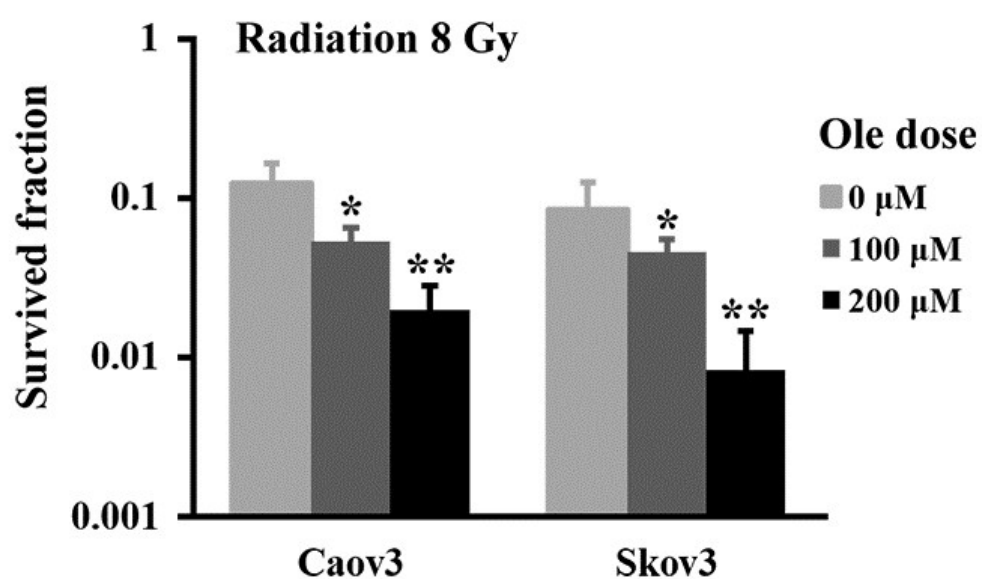

**Figure S1.** Ovarian cancer cells Caov3 and Skov3 were cultured in increasing concentrations of oleuropein (ole, 0, 100, 200  $\mu\text{M}$ ), respectively, and subjected to 8 Gy radiation, followed by clonogenic assay to measure survived cells.
